# Supplementary material
Source: Elsevier journal article supplement (https://www.sciencedirect.com/science/article/pii/S0300893224003166)
Supplement: mmc1 [file mmc1.pdf]

## SUPPLEMENTARY DATA

### **Propensity score-matched methodology**

A nonparsimonious propensity score-matched analysis was performed between the 2 groups. A propensity score was estimated using a logistic regression model. The dependent variable was thrombocytopenia (yes/no); independent variables were those baseline characteristics found to have statistically significant differences between patients with and without thrombocytopenia and other variables considered to be clinically relevant. The final variables included in the propensity score matching were body surface area, diabetes mellitus, peripheral vascular disease, baseline eGFR, TAVR before 2015, transfemoral access, Portico THV, and major vascular complications.

A propensity score-matched cohort was then created with a 1:1 ratio using a “nearest neighbor” match without replacement. A caliper width of  $< 0.1 \times$  the SD of the logistic score was applied. The appropriateness of the matching was assessed in several ways: smoothed Kernel density plots of the logistic score were computed to visually assess the balance between groups before and after matching (**figure 2 of the supplementary data**). Then, standardized mean differences (SMD) were calculated for all covariates (both those included and not included in the logistic score calculation) to assess for potential imbalances between thrombocytopenia and no-thrombocytopenia groups (**table 4 of the supplementary data**).

**Table 1 of the supplementary data .** Independent predictors of 30-day mortality

|                                            | Univariable analysis<br>OR (95% CI) | P      | Multivariable<br>analysis<br>OR (95% CI) | P      |
|--------------------------------------------|-------------------------------------|--------|------------------------------------------|--------|
| <i>Age*</i>                                | 1.35 (1.0-1.8)                      | 0.043  |                                          |        |
| <i>STS score</i>                           | 1.0 (1.0-1.1)                       | < .001 |                                          |        |
| <i>Major vascular complication</i>         | 7.5 (4.7-12.1)                      | < .001 | 4.0 (1.9-8.1)                            | < .001 |
| <i>Life-threatening and major bleeding</i> | 9.6 (6.3-14.5)                      | < .001 |                                          |        |
| <i>Acute kidney injury</i>                 |                                     |        |                                          |        |
| Stage 1                                    | 3.5 (2.1-5.7)                       | < .001 | 3.0 (1.6-5.9)                            | .001   |
| Stage 2                                    | 11.3 (4.8-26.5)                     | < .001 | 10.2 (3.2-32.3)                          | < .001 |
| Stage 3                                    | 14.4 (7.2-28.6)                     | < .001 | 11.8 (4.8-29.1)                          | < .001 |
| <i>Periprocedural stroke</i>               | 6.7 (3.5-12.8)                      | < .001 | 4.5 (1.8-11.7)                           | .002   |
| <i>Severe aortic regurgitation</i>         | 7.4 (1.7-32.8)                      | .009   | 4.9 (1.0-24.1)                           | .049   |
| <i>Thrombocytopenia</i>                    | 4.6 (3.1-6.7)                       | < .001 | 2.3 (1.3-4.2)                            | .004   |
| <i>TAVR before 2015</i>                    | 2.02 (1.38-2.98)                    | < .001 |                                          |        |

\*Each 10-year increase.

**Table 2 of the supplementary data.** In hospital outcomes among patients with thrombocytopenia according to early and late nadir

|                                                        | No TP<br>(n = 2526) | Early nadir (n = 323) | Late nadir<br>(n = 192) | P      | P<br>(no TP vs<br>early TP) | P<br>(early vs<br>late TP) |
|--------------------------------------------------------|---------------------|-----------------------|-------------------------|--------|-----------------------------|----------------------------|
| <b>Clinical endpoints</b>                              |                     |                       |                         |        |                             |                            |
| <i>30-day mortality</i>                                | 36 (1.5)            | 14 (4.4)              | 23 (12.1)               | < .001 | < .001                      | .001                       |
| <i>Stroke</i>                                          | 52 (2.1)            | 11 (3.4)              | 7 (3.7)                 | .140   | .125                        | .874                       |
| <b>Vascular complications</b>                          |                     |                       |                         |        |                             |                            |
| <i>Major vascular complication</i>                     | 83 (3.3)            | 42 (13.0)             | 18 (9.4)                | < .001 | < .001                      | .215                       |
| <i>Minor vascular complication</i>                     | 235 (9.3)           | 50 (15.5)             | 20 (10.4)               | .002   | .001                        | .105                       |
| <b>Bleeding complications</b>                          |                     |                       |                         |        |                             |                            |
| <i>Life-threatening</i>                                | 47 (1.9)            | 36 (11.2)             | 17 (8.9)                | < .001 | < .001                      | .402                       |
| <i>Major</i>                                           | 86 (3.4)            | 26 (8.1)              | 13 (6.8)                | < .001 | < .001                      | .589                       |
| <i>Minor</i>                                           | 229 (10.0)          | 49 (17.0)             | 20 (11.3)               | .001   | < .001                      | .095                       |
| <b>AKI</b>                                             |                     |                       |                         |        |                             |                            |
| <i>Stage I</i>                                         | 247 (10.1)          | 49 (15.7)             | 39 (21.0)               |        |                             |                            |
| <i>Stage II</i>                                        | 23 (0.9)            | 8 (2.6)               | 8 (4.3)                 |        | .001                        | < .001                     |
| <i>Stage III</i>                                       | 32 (1.3)            | 5 (1.6)               | 15 (8.1)                |        |                             |                            |
| <i>Stage II or III</i>                                 | 55 (2.2)            | 13 (4.2)              | 23 (12.4)               | < .001 | .039                        | .001                       |
| <i>Any AKI</i>                                         | 302 (12.3)          | 62 (19.9)             | 62 (33.3)               | < .001 | < .001                      | .001                       |
| <b>New permanent PM implantation</b>                   | 426 (16.9)          | 71 (22.0)             | 57 (29.7)               | < .001 | .023                        | .050                       |
| <b>Postprocedural AR</b>                               |                     |                       |                         |        |                             |                            |
| <i>Moderate</i>                                        | 107 (4.4)           | 16 (5.0)              | 15 (8.5)                |        |                             |                            |
| <i>Severe</i>                                          | 9 (0.4)             | 2 (0.7)               | 3 (1.7)                 | .038   | .352                        | .362                       |
| <b>Postprocedural mean aortic valve gradient, mmHg</b> | 10.7 (5.7)          | 10.6 (5.2)            | 10.4 (6.7)              | .480   | .775                        | .701                       |
| <b>Length of ICU stay, d</b>                           | 1 [0-2]             | 1 [0-2]               | 2 [0-5]                 |        | .001                        | < .001                     |
| <b>Length of hospital stay, d</b>                      | 6 [5-8]             | 7 [6-11]              | 9 [6-14]                |        | < .001                      | < .001                     |

|                                 |             |            |            |        |        |      |
|---------------------------------|-------------|------------|------------|--------|--------|------|
| <b>Early safety (at 30 d)</b>   | 1826 (73.8) | 172 (53.9) | 88 (45.8)  | < .001 | < .001 | .077 |
| <b>Device success (at 30 d)</b> | 2175 (89.4) | 239 (76.9) | 136 (72.7) | < .001 | < .001 | .302 |

The data are expressed as No. (%) or median [interquartile range].

**Table 3 of the supplementary data.** Independent predictors of late thrombocytopenia

|                                           | Univariable analysis<br>OR (95%CI) | <i>P</i> | Multivariate analysis<br>OR (95%CI) | <i>P</i>        |
|-------------------------------------------|------------------------------------|----------|-------------------------------------|-----------------|
| <b>Age*</b>                               | 1.31 (1.04-1.65)                   | .020     |                                     |                 |
| <b>Body mass index, cm/m<sup>2</sup></b>  | 0.97 (0.94-1.00)                   | .028     |                                     |                 |
| <b>Body surface area, m<sup>2</sup></b>   | 0.19 (0.12-0.29)                   | < .001   | 0.34 (0.14-0.85)                    | <b>.020</b>     |
| <b>Atrial fibrillation</b>                | 1.50 (1.19-2.14)                   | .002     |                                     |                 |
| <b>Baseline peak aortic gradient</b>      | 0.99 (0.98-1.00)                   | .015     |                                     |                 |
| <b>Baseline eGFR**</b>                    | 1.19 (1.11-1.27)                   | < .001   |                                     |                 |
| <b>Previous myocardial infarction</b>     | 1.82 (1.16-2.84)                   | .009     |                                     |                 |
| <b>STS score</b>                          | 1.04 (1.01-1.06)                   | .003     | 1.03 (1.01-1.06)                    | <b>.019</b>     |
| <i>Major vascular complication</i>        | 2.25 (1.34-3.77)                   | .002     |                                     |                 |
| <b>Major or life-threatening bleeding</b> | 2.42 (1.60-3.67)                   | < .001   | 2.04 (1.20-3.47)                    | <b>.008</b>     |
| <b>Moderate-severe residual AR</b>        | 2.20 (1.31-3.69)                   | .003     | 1.99 (1.08-3.70)                    | <b>.028</b>     |
| <b>Acute kidney injury stage 2 or 3</b>   | 5.60 (3.42-9.27)                   | < .001   | 4.33 (2.24-8.38)                    | <b>&lt;.001</b> |

\*Each 10-year increase.

\*\* Each decrease of 10 mL/min/1.73m<sup>2</sup>.

**Table 4 of the supplementary data.** Standardized mean deviation after propensity score matching.

|                                    | Postpropensity score matching    |                               | SMD    |
|------------------------------------|----------------------------------|-------------------------------|--------|
|                                    | No thrombocytopenia<br>(n = 543) | Thrombocytopenia<br>(n = 543) |        |
| Age                                | 81.5 ± 6.9                       | 81.2 ± 6.6                    | 0.035  |
| Female sex                         | 321 (59.1)                       | 303 (55.8)                    | 0.055  |
| Body mass index, kg/m <sup>2</sup> | 27.3 ± 5.1                       | 27.2 ± 4.9                    | 0.023  |
| Body surface area, m <sup>2</sup>  | 1.72 ± 0.2                       | 1.73 ± 0.2                    | -0.018 |
| Diabetes                           | 178 (32.8)                       | 170 (31.3)                    | 0.026  |
| Hypertension                       | 451 (83.2)                       | 462 (85.1)                    | -0.042 |
| Coronary artery disease            | 256 (47.3)                       | 244 (45.2)                    | 0.035  |
| Previous CABG                      | 72 (13.3)                        | 71 (13.1)                     | 0.003  |
| Atrial fibrillation                | 210 (38.7)                       | 195 (36.0)                    | 0.044  |
| Previous CVA                       | 62 (11.5)                        | 69 (12.9)                     | -0.035 |
| COPD                               | 91 (16.8)                        | 110 (20.3)                    | -0.073 |
| Peripheral vascular disease        | 116 (21.4)                       | 119 (21.9)                    | -0.011 |
| eGFR                               | 55.1 ± 22.4                      | 54.7 ± 24.1                   | 0.016  |
| STS score                          | 6.1 ± 5.2                        | 5.8 ± 5.1                     | 0.058  |
| LVEF, %                            | 56.3 ± 12.4                      | 55.9 ± 13.3                   | -0.028 |
| Mean aortic gradient, mmHg         | 45.8 ± 16.0                      | 45.3 ± 15.6                   | 0.031  |
| Aortic valve area, cm <sup>2</sup> | 0.68 ± 0.21                      | 0.70 ± 0.33                   | -0.096 |
| Moderate-to-severe MR              | 121 (22.9)                       | 105 (19.6)                    | 0.066  |
| Year of TAVR                       | 2017 [2015-2019]                 | 2017 [2015-2019]              | 0.038  |
| TAVR before 2015                   | 172 (31.7)                       | 178 (32.8)                    | -0.019 |
| Portico, Abbott                    | 105 (19.3)                       | 99 (18.2)                     | 0.023  |
| Sapien, Edwards                    | 334 (61.5)                       | 368 (67.8)                    | -0.106 |
| General anaesthesia                | 194 (51.7)                       | 226 (56.8)                    | 0.083  |
| Prior balloon valvuloplasty        | 292 (54.1)                       | 303 (55.8)                    | -0.028 |
| Balloon postdilatation             | 93 (17.2)                        | 96 (17.7)                     | -0.010 |
| Major vascular complication        | 52 (9.6)                         | 54 (9.9)                      | -0.010 |
| Postprocedural severe AR           | 3 (0.6)                          | 6 (1.2)                       | -0.057 |

The data are presented as No. (%), mean ± standard deviation, or median [interquartile range].

**Table 5 of the supplementary data.** Primary and secondary endpoints in the propensity score matched cohort.

|                              | Propensity score-matched cohort  |                               | P      |
|------------------------------|----------------------------------|-------------------------------|--------|
|                              | No-thrombocytopenia<br>(n = 543) | Thrombocytopenia<br>(n = 543) |        |
| 30-day all-cause mortality   | 13 (2.5)                         | 39 (7.3)                      | < .001 |
| Procedural safety            | 379 (71.4)                       | 289 (53.6)                    | < .001 |
| Two-year all-cause mortality | 16.7                             | 29.2                          | < .001 |

The data are expressed as No. (%).

**Figure 1 of the supplementary data.** Dynamics of platelets count and incidence of thrombocytopenia according to type of THV.

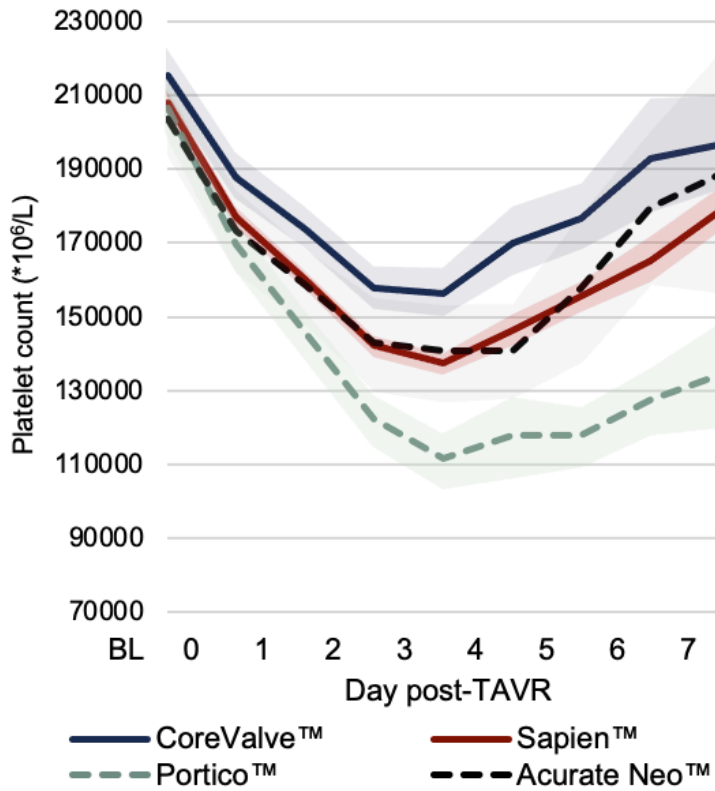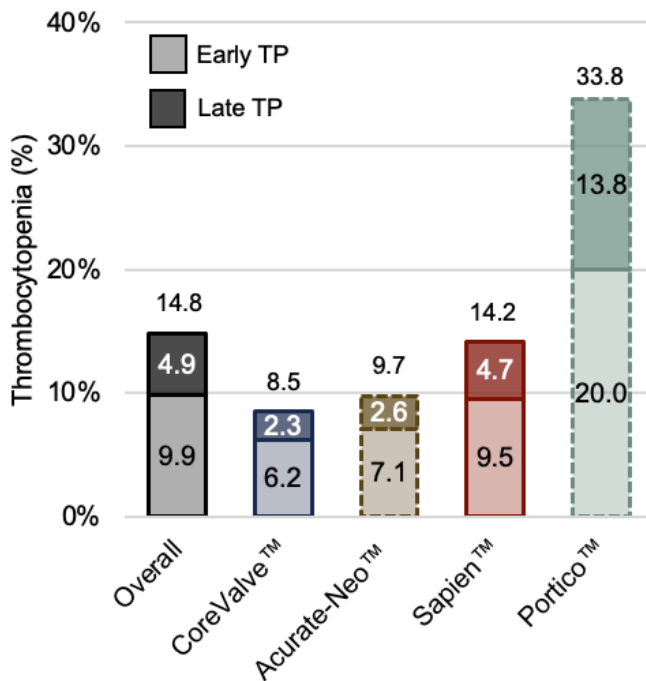

Correcciones a la figura

Indicar números en formato REC con espacio fino entre cifras de más de 4 dígitos



Figure 2 of the supplementary data. Smoothed Kernel density plots.

Before propensity score matching.

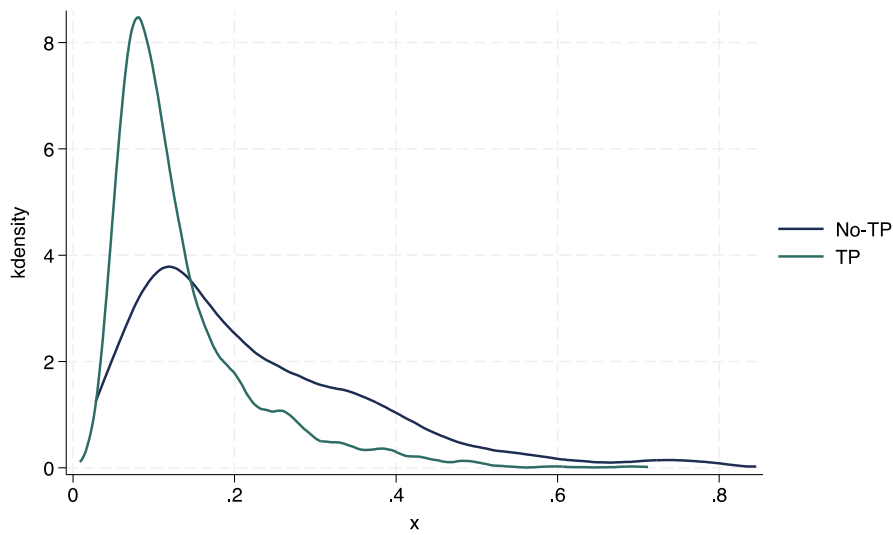

After propensity score matching

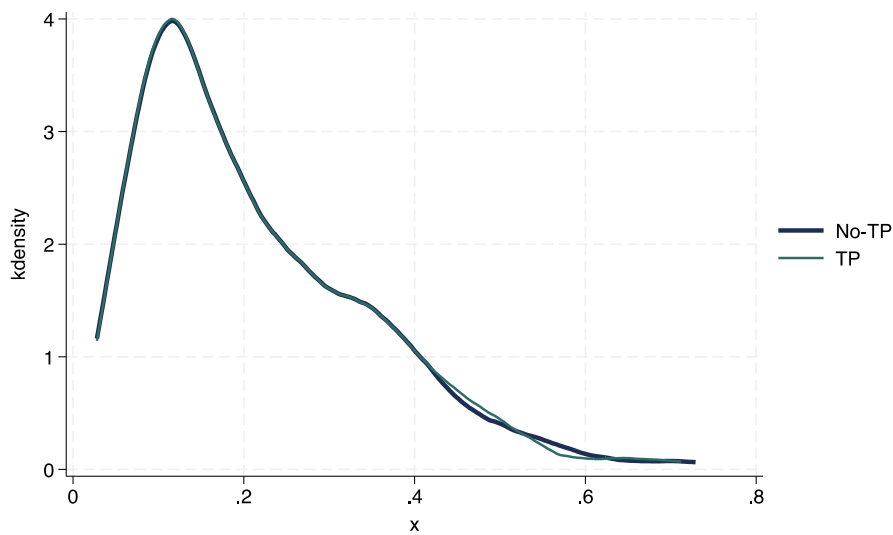

**Figure 3 of the supplementary data.** Two-year all-cause and cardiovascular mortality according to thrombocytopenia in the propensity-score-matched cohort.

All-cause mortality

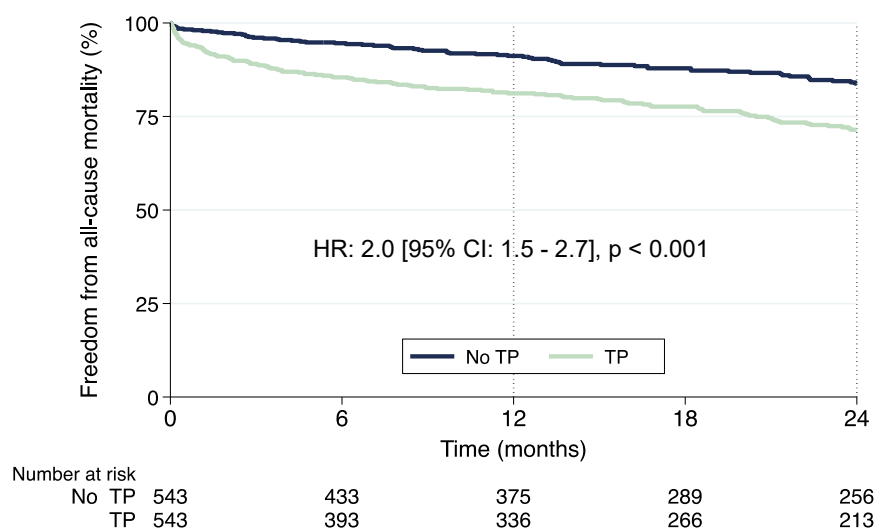

Cardiovascular mortality

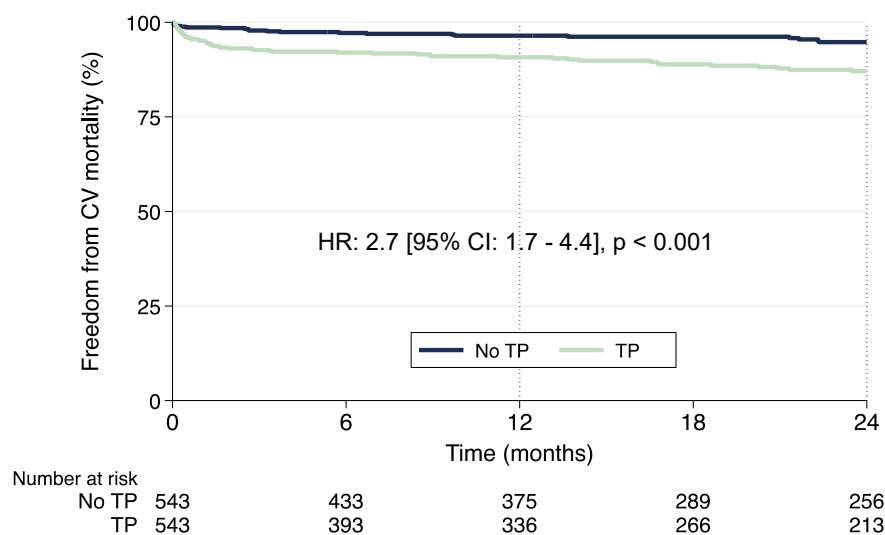

Correcciones a la figura

Cerrar (95%CI)

Indicar valores de P en formato REC
